# Supplementary material
Source: publisher site journal article supplement (https://iopscience.iop.org/1748-9326/15/10/1040A9/media/ERL_15_10_1040a9_suppdata1.pdf)
Supplement: Supplementary file 1 [file ERL_15_10_1040a9_suppdata1.pdf]

ShieldSquare Error


# Something went wrong

An error has prevented the portal from working properly.

Please contact us.

You reached this page when trying to access
**MDI3MDQ5ZTAzYjcxLTcyNDgtZjNlNC03NDRiLWRhYzdkOTUy** from
**3.133.131.168** on
**April 25 2024, 02:07:20 UTC**
